# Supplementary material
Source: publisher figshare collection journal article supplement (https://acs.figshare.com/ndownloader/files/5717913)
Supplement: Supplementary file 1 [file 5717913]

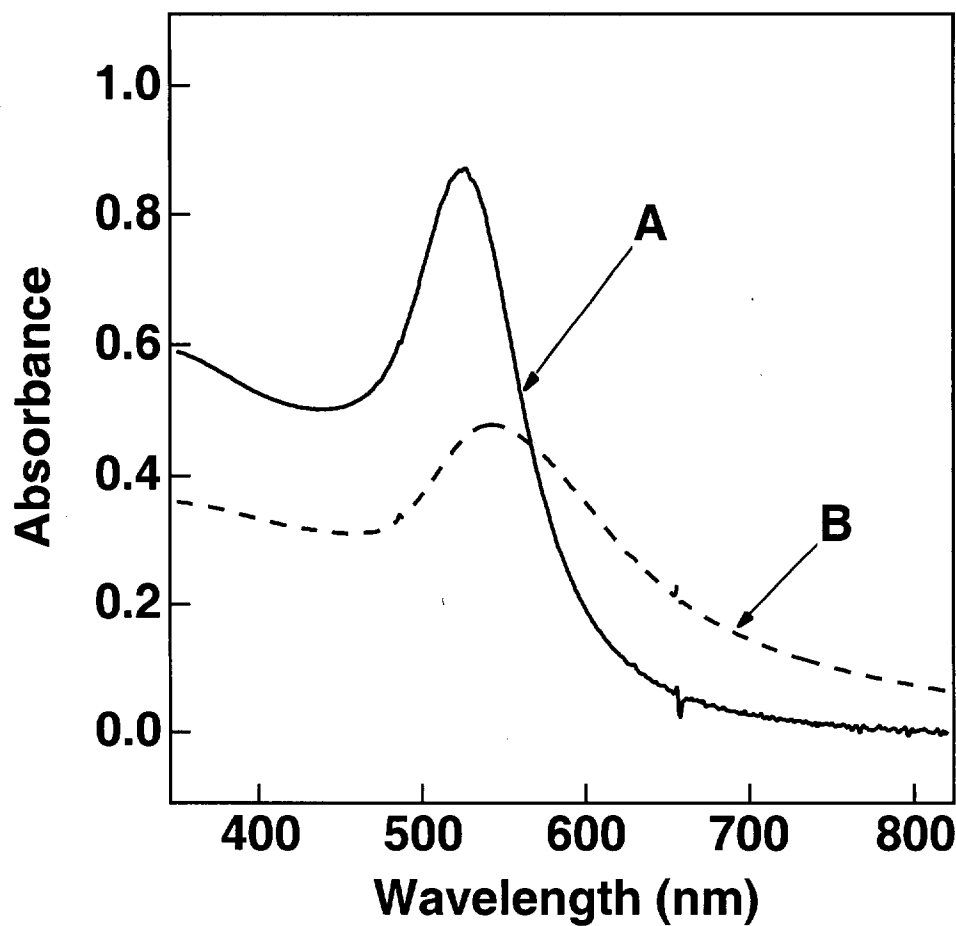

**Supporting Information 1.** UV-vis spectra of colloidal Au mixture of two different probes (S3:Au, S4:Au) without (A), and with (B) the linking oligonucleotide (S2) present in solution.

He et. al., "Colloidal Au-Enhanced Surface Plasmon Resonance...", Supporting Information 1.

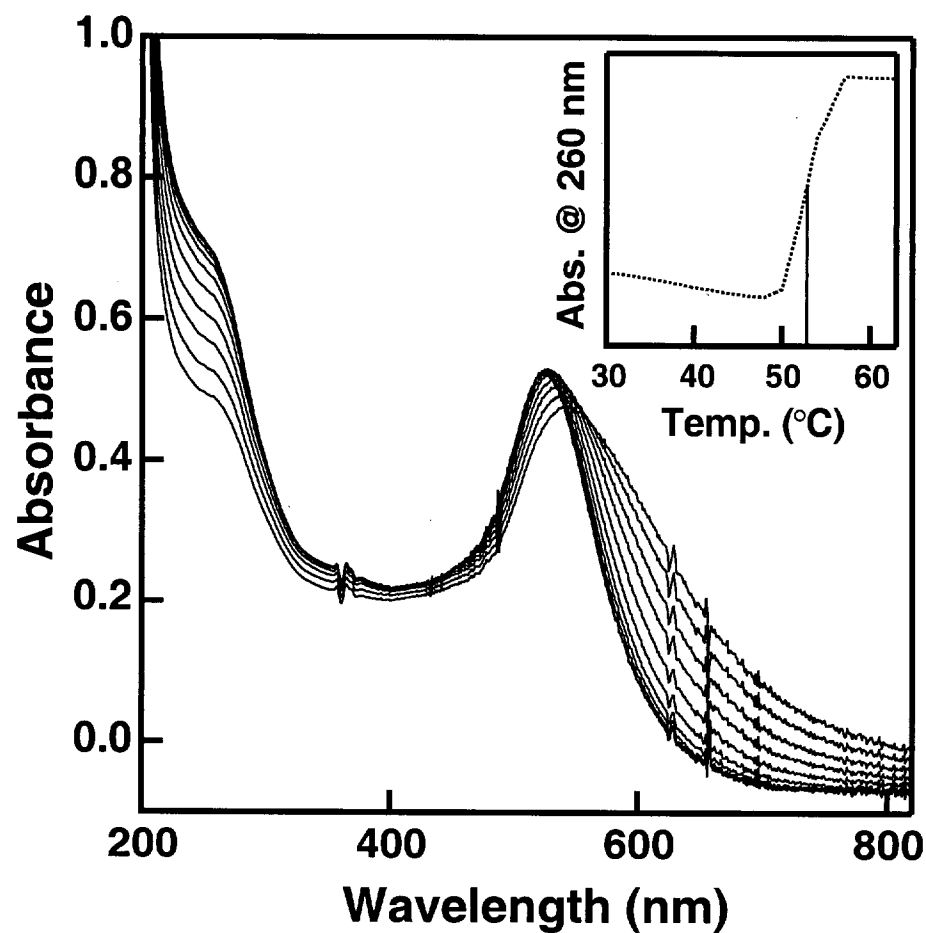

**Supporting Information 2.** UV-vis spectra of colloidal Au mixture of two different probes (S3: Au, S4: Au) with the linking oligonucleotide (S2) at different temperatures. The inset shows the absorbance change at 260 nm as a function of solution temperature, with the melting temperature (53°) labeled.

3

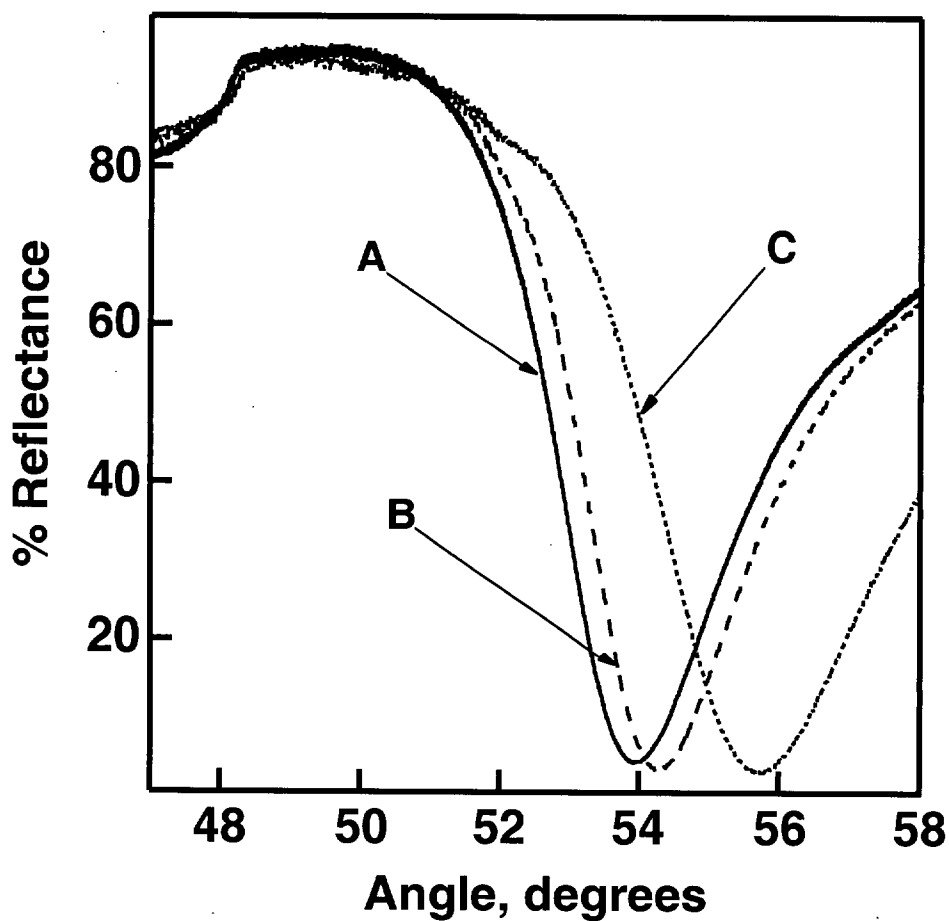

**Supporting Information 3.** SPR curves of S1-coated Au surface before (A), after exposure to the non-complementary probe (S4):Au conjugates (B), and the complementary probe (S3):Au conjugates (C).

He et. al., "Colloidal Au-Enhanced Surface Plasmon Resonance...", Supporting Information 3.

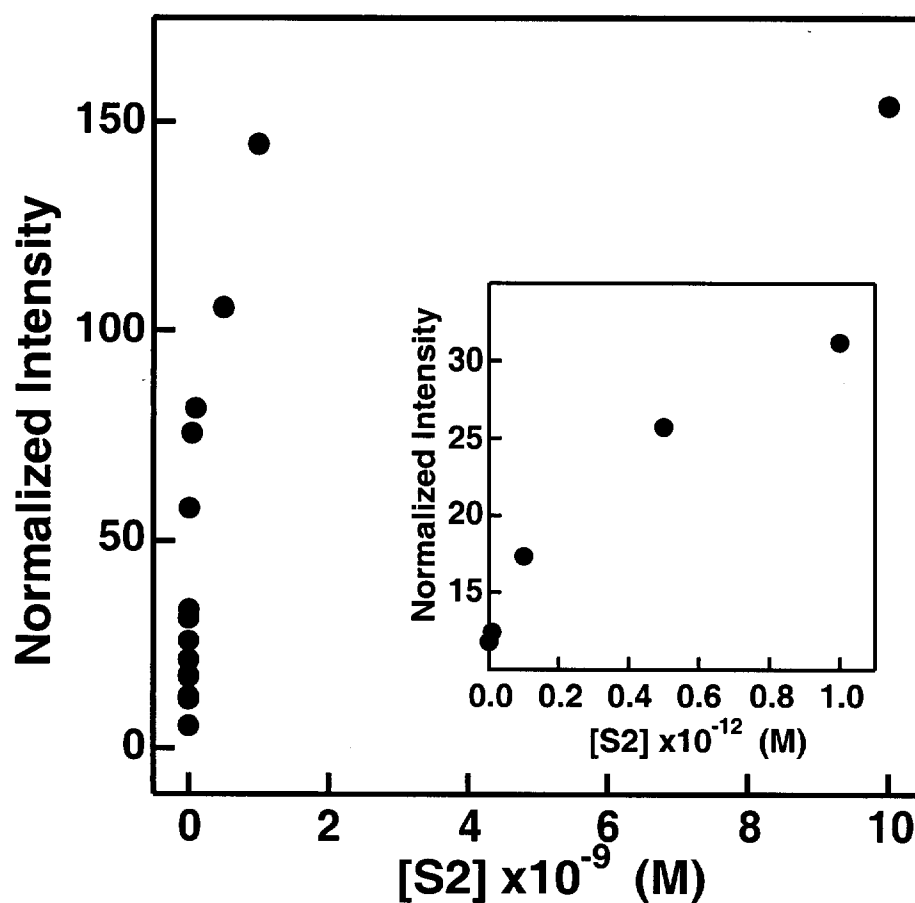

**Supporting Information 4:** Plot of normalized intensity of SPR reflectance as a function of the analyte 24-mer oligo (S2) concentration. Inset: blow up of low concentration data of [S2] ranging from 1 fM to 1 pM.

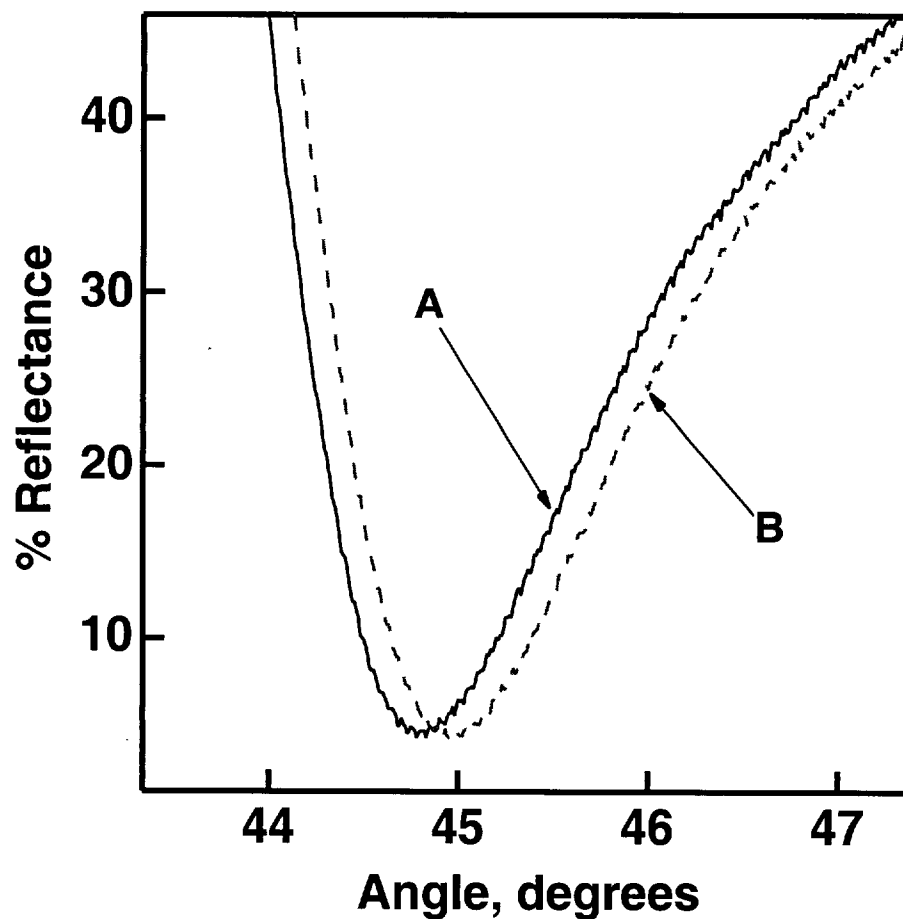

**Supporting Information 5:** Blow up of SPR curves of the surface prepared in Figure 6, #1 (A), and #2 (B) to the surface, demonstrating detectability of  $0.12^\circ$  angle shift for the unamplified event with  $[S_2] = 10 \text{ nM}$ .

He et. al., "Colloidal Au-Enhanced Surface Plasmon Resonance...", Supporting Information 5.
